# Supplementary material
Source: PubMed Central journal article supplement (PMC5513488)
Supplement: NIHMS873546-supplement-2.pdf [file NIHMS873546-supplement-2.pdf]

| Chromosome | Position  | NT Change | Gene     | Forward Primer           | Reverse Primer        | Sequence Verified | Non-WT |
|------------|-----------|-----------|----------|--------------------------|-----------------------|-------------------|--------|
| chr02a     | 69622054  | C->T      | APLF     | AAACTTCCAATAGAGGAACTTGGT | GTACAAACAGCAGAAACACG  | 9                 | 1      |
| chr02b     | 121111612 | C->T      | CHRNA    | GGAATCAGGAGGAGCGCCTG     | CCACAATCATGGGGGTTTTTC | 9                 | 1      |
| chr06      | 171483955 | G->A      | FAM120B  | ACCCCTACCATTGTGGTTGA     | ATCCCAAGGCAGTTATGCTG  | 9                 | 1      |
| chr08      | 31137399  | C->T      | WRN      | CTGTAGACAGACCTCTTTTC     | GATTTATTGTAGAGTTGGAGG | 9                 | 1      |
| chr12      | 19125817  | C->T      | PIK3C2G  | CACTAAGATTGCAGTAATGCA    | GGGATATTATGGGAGGATATG | 9                 | 7      |
| chr14      | 21536722  | C->T      | SLC28A2  | CTGGGAGAACTGGTGGACAT     | CTGCTAGGTATGCTGTTCTGC | 9                 | 1      |
| chr15      | 80969211  | T->C      | APOBEC3G | CACAGAGCGGCCTGTCTTTA     | AGCCATGACTTTCACGGGAG  | 10                | 6      |
