# Supplementary material
Source: PubMed Central journal article supplement (PMC5513488)
Supplement: NIHMS873546-supplement-4.pdf [file NIHMS873546-supplement-4.pdf]

| Chromosome | Position  | REF | ALT | Allele Frequency | AF (Chinese) | AF (Indian) | Gene Id | Gene     | Predicted Effect     |
|------------|-----------|-----|-----|------------------|--------------|-------------|---------|----------|----------------------|
| chr01      | 7103314   | G   | T   | 0.024            | N/A          | 0.033       | 54206   | ERRFI1   | STOP_GAINED          |
| chr01      | 11889929  | C   | T   | 0.048            | 0.167        | N/A         | 343066  | AADACL4  | STOP_GAINED          |
| chr01      | 12018500  | C   | A   | 0.024            | 0.083        | N/A         | 440560  | PRAMEF11 | SPLICE_SITE_ACCEPTOR |
| chr01      | 15566773  | T   | C   | 0.024            | 0.083        | N/A         | 9696    | CROCC    | SPLICE_SITE_DONOR    |
| chr01      | 15981286  | T   | A   | 0.619            | 0.583        | 0.633       | 23569   | PADI4    | STOP_GAINED          |
| chr01      | 17960619  | G   | A   | 0.024            | N/A          | 0.033       | 22977   | AKR7A3   | STOP_GAINED          |
| chr01      | 20506040  | C   | A   | 0.024            | 0.083        | N/A         | 3339    | HSPG2    | SPLICE_SITE_ACCEPTOR |
| chr01      | 22467846  | C   | T   | 0.048            | N/A          | 0.067       | 3155    | HMGCL    | STOP_GAINED          |
| chr01      | 26040789  | G   | A   | 0.024            | 0.083        | N/A         | 9064    | MAP3K6   | STOP_GAINED          |
| chr01      | 30663397  | G   | A   | 0.095            | 0.333        | N/A         | 90853   | SPOCD1   | STOP_GAINED          |
| chr01      | 31051220  | C   | T   | 0.286            | N/A          | 0.4         | 55721   | IQCC     | STOP_GAINED          |
| chr01      | 39728859  | A   | G   | 0.425            | 0.667        | 0.321       | 4802    | NFYC     | SPLICE_SITE_DONOR    |
| chr01      | 44091952  | G   | A   | 0.025            | 0.083        | N/A         | 343521  | TCTEX1D4 | STOP_GAINED          |
| chr01      | 47814563  | G   | A   | 0.024            | N/A          | 0.033       | 84871   | AGBL4    | STOP_GAINED          |
| chr01      | 52799026  | C   | A   | 0.025            | N/A          | 0.036       | 63948   | DMRTB1   | STOP_GAINED          |
| chr01      | 54342876  | A   | G   | 0.025            | 0.083        | N/A         | 199964  | TMEM61   | START_LOST           |
| chr01      | 54348164  | C   | T   | 0.075            | N/A          | 0.107       | 199964  | TMEM61   | STOP_GAINED          |
| chr01      | 62921840  | T   | C   | 0.024            | 0.083        | N/A         | 84455   | EFCAB7   | SPLICE_SITE_DONOR    |
| chr01      | 69926113  | G   | T   | 0.024            | N/A          | 0.033       | 1491    | CTH      | STOP_GAINED          |
| chr01      | 77694216  | T   | A   | 0.024            | N/A          | 0.033       | 8880    | FUBP1    | SPLICE_SITE_ACCEPTOR |
| chr01      | 86293264  | C   | T   | 0.048            | N/A          | 0.067       | 9635    | CLCA2    | STOP_GAINED          |
| chr01      | 86408706  | A   | T   | 0.548            | 0.667        | 0.5         | 22802   | CLCA4    | STOP_GAINED          |
| chr01      | 104046100 | G   | T   | 0.024            | 0.083        | N/A         | 280     | AMY2B    | SPLICE_SITE_DONOR    |
| chr01      | 109817946 | G   | A   | 0.024            | 0.083        | N/A         | 57535   | KIAA1324 | STOP_GAINED          |
| chr01      | 110173116 | C   | T   | 0.024            | N/A          | 0.033       | 83873   | GPR61    | STOP_GAINED          |
| chr01      | 113326930 | T   | C   | 0.071            | 0.25         | N/A         | 284467  | FAM19A3  | SPLICE_SITE_DONOR    |
| chr01      | 117763632 | C   | T   | 0.024            | 0.083        | N/A         | 8458    | TTF2     | SPLICE_SITE_ACCEPTOR |
| chr01      | 120606067 | G   | C   | 0.024            | 0.083        | N/A         | 83998   | REG4     | STOP_GAINED          |
| chr01      | 123100544 | T   | C   | 0.786            | 0.667        | 0.833       | 200035  | NUDT17   | SPLICE_SITE_DONOR    |
| chr01      | 125107452 | C   | T   | 0.024            | N/A          | 0.033       | 149428  | BNIPL    | STOP_GAINED          |
| chr01      | 126235123 | G   | C   | 0.024            | 0.083        | N/A         | 126637  | TCHHL1   | STOP_GAINED          |
| chr01      | 126745117 | G   | A   | 0.119            | 0.333        | 0.033       | 353142  | LCE3A    | STOP_GAINED          |
| chr01      | 129487313 | C   | T   | 0.5              | 0.5          | 0.5         | 2629    | GBA      | SPLICE_SITE_DONOR    |

|        |           |   |   |       |       |       |        |          |                      |
|--------|-----------|---|---|-------|-------|-------|--------|----------|----------------------|
| chr01  | 129488252 | G | A | 0.5   | 0.5   | 0.5   | 2629   | GBA      | STOP_GAINED          |
| chr01  | 129488531 | G | A | 0.5   | 0.5   | 0.5   | 2629   | GBA      | STOP_GAINED          |
| chr01  | 129489563 | C | T | 0.5   | 0.5   | 0.5   | 2629   | GBA      | SPLICE_SITE_DONOR    |
| chr01  | 129873571 | C | T | 0.275 | 0.25  | 0.286 | 7818   | DAP3     | STOP_GAINED          |
| chr01  | 132580392 | G | A | 0.024 | 0.083 | N/A   | 913    | CD1E     | STOP_GAINED          |
| chr01  | 132831212 | G | A | 0.143 | 0.083 | 0.167 | 128366 | OR6P1    | STOP_GAINED          |
| chr01  | 132987011 | G | A | 0.024 | 0.083 | N/A   | 391114 | OR6K3    | STOP_GAINED          |
| chr01  | 133057316 | G | A | 0.048 | 0.167 | N/A   | 81442  | OR6N2    | STOP_GAINED          |
| chr01  | 134208949 | G | A | 0.119 | N/A   | 0.167 | 57549  | IGSF9    | STOP_GAINED          |
| chr01  | 135134092 | G | A | 0.214 | 0.083 | 0.267 | 51744  | CD244    | STOP_GAINED          |
| chr01  | 138822523 | G | A | 0.19  | N/A   | 0.267 | 84033  | OBSCN    | STOP_GAINED          |
| chr01  | 139990513 | C | T | 0.024 | N/A   | 0.033 | 2052   | EPHX1    | STOP_GAINED          |
| chr01  | 156238930 | A | G | 0.071 | N/A   | 0.1   | 148304 | C1orf74  | START_LOST           |
| chr01  | 161170940 | T | C | 0.167 | 0.417 | 0.067 | 23114  | NFASC    | SPLICE_SITE_ACCEPTOR |
| chr01  | 167750602 | G | T | 0.024 | 0.083 | N/A   | 127124 | ATP6V1G3 | SPLICE_SITE_DONOR    |
| chr01  | 184268143 | C | T | 0.024 | 0.083 | N/A   | 6041   | RNASEL   | STOP_GAINED          |
| chr01  | 195749432 | C | T | 0.024 | 0.083 | N/A   | 2329   | FMO4     | STOP_GAINED          |
| chr01  | 210900710 | C | G | 0.071 | N/A   | 0.1   | 23029  | RBM34    | START_LOST           |
| chr01  | 211984534 | T | G | 0.024 | 0.083 | N/A   | 7107   | GPR137B  | STOP_GAINED          |
| chr01  | 224290694 | T | C | 0.238 | 0.25  | 0.233 | 127064 | OR2T12   | START_LOST           |
| chr01  | 224521195 | G | A | 0.31  | 0.083 | 0.4   | 401994 | OR14I1   | STOP_GAINED          |
| chr02a | 3585714   | C | T | 0.071 | 0.083 | 0.067 | 78989  | COLEC11  | STOP_GAINED          |
| chr02a | 10160188  | G | A | 0.167 | N/A   | 0.333 | 192668 | CYS1     | STOP_GAINED          |
| chr02a | 27437486  | C | T | 0.083 | N/A   | 0.125 | 10669  | CGREF1   | SPLICE_SITE_DONOR    |
| chr02a | 27446137  | C | T | 0.071 | 0.167 | 0.033 | 84696  | ABHD1    | STOP_GAINED          |
| chr02a | 27446903  | G | C | 0.071 | 0.083 | 0.067 | 84696  | ABHD1    | SPLICE_SITE_ACCEPTOR |
| chr02a | 31646409  | C | T | 0.119 | N/A   | 0.167 | 440854 | CAPN14   | SPLICE_SITE_DONOR    |
| chr02a | 31667056  | G | A | 0.024 | 0.083 | N/A   | 440854 | CAPN14   | STOP_GAINED          |
| chr02a | 38568042  | C | T | 0.119 | 0.167 | 0.1   | 1545   | CYP1B1   | SPLICE_SITE_DONOR    |
| chr02a | 39751302  | C | A | 0.024 | 0.083 | N/A   | 344387 | CDKL4    | SPLICE_SITE_DONOR    |
| chr02a | 39771909  | G | A | 0.024 | N/A   | 0.033 | 344387 | CDKL4    | STOP_GAINED          |
| chr02a | 42997896  | A | G | 0.024 | 0.083 | N/A   | 9167   | COX7A2L  | STOP_LOST            |
| chr02a | 62063425  | G | T | 0.024 | 0.083 | N/A   | 130872 | AHSA2    | SPLICE_SITE_DONOR    |
| chr02a | 69622054  | C | T | 0.024 | 0.083 | N/A   | 200558 | APLF     | STOP_GAINED          |

|        |           |   |   |       |       |       |        |         |                      |
|--------|-----------|---|---|-------|-------|-------|--------|---------|----------------------|
| chr02a | 71955783  | C | T | 0.167 | N/A   | 0.233 | 165530 | CLEC4F  | STOP_GAINED          |
| chr02a | 76833172  | A | G | 0.119 | 0.333 | 0.033 | 6936   | GCFC2   | STOP_LOST            |
| chr02a | 88118465  | A | G | 0.024 | 0.083 | N/A   | 65055  | REEP1   | SPLICE_SITE_DONOR    |
| chr02a | 96339891  | G | A | 0.024 | N/A   | 0.033 | 11138  | TBC1D8  | STOP_GAINED          |
| chr02a | 107988402 | T | C | 0.095 | 0.25  | 0.033 | 27179  | IL36A   | SPLICE_SITE_DONOR    |
| chr02b | 263751    | G | A | 0.053 | N/A   | 0.077 | 55997  | CFC1    | STOP_GAINED          |
| chr02b | 12200354  | T | G | 0.024 | N/A   | 0.033 | 8685   | MARCO   | SPLICE_SITE_ACCEPTOR |
| chr02b | 20448895  | C | T | 0.024 | 0.083 | N/A   | 80122  | MAP3K19 | START_LOST           |
| chr02b | 24594351  | C | T | 0.238 | 0.417 | 0.167 | 339745 | SPOPL   | STOP_GAINED          |
| chr02b | 24595942  | G | A | 0.357 | 0.5   | 0.3   | 339745 | SPOPL   | STOP_GAINED          |
| chr02b | 34368825  | A | G | 0.095 | 0.333 | N/A   | 5000   | ORC4    | SPLICE_SITE_DONOR    |
| chr02b | 38198171  | T | A | 0.357 | 0.417 | 0.333 | 26225  | ARL5A   | STOP_GAINED          |
| chr02b | 44726836  | T | G | 0.024 | 0.083 | N/A   | 151531 | UPP2    | STOP_GAINED          |
| chr02b | 45244258  | C | T | 0.19  | N/A   | 0.267 | 8502   | PKP4    | SPLICE_SITE_DONOR    |
| chr02b | 77000595  | C | T | 0.024 | 0.083 | N/A   | 54529  | ASNSD1  | STOP_GAINED          |
| chr02b | 94579645  | C | A | 0.167 | N/A   | 0.233 | 391475 | DYTN    | STOP_GAINED          |
| chr02b | 103097083 | T | A | 0.024 | N/A   | 0.033 | 26154  | ABCA12  | STOP_GAINED          |
| chr02b | 109717234 | G | A | 0.024 | 0.083 | N/A   | 2043   | EPHA4   | STOP_GAINED          |
| chr02b | 121111612 | C | T | 0.024 | 0.083 | N/A   | 1146   | CHRNA1  | STOP_GAINED          |
| chr02b | 122256190 | T | A | 0.048 | N/A   | 0.067 | 54577  | UGT1A7  | STOP_GAINED          |
| chr03  | 1403067   | T | C | 0.071 | 0.083 | 0.067 | 84984  | CEP19   | START_LOST           |
| chr03  | 3336662   | G | T | 0.071 | N/A   | 0.1   | 93109  | TMEM44  | SPLICE_SITE_ACCEPTOR |
| chr03  | 4627304   | G | A | 0.024 | N/A   | 0.033 | 344905 | ATP13A5 | STOP_GAINED          |
| chr03  | 28504839  | A | G | 0.071 | N/A   | 0.1   | 79750  | ZNF385D | START_LOST           |
| chr03  | 31737667  | C | T | 0.119 | 0.083 | 0.133 | 23180  | RFTN1   | STOP_GAINED          |
| chr03  | 31793906  | G | C | 0.024 | N/A   | 0.033 | 285381 | DPH3    | SPLICE_SITE_ACCEPTOR |
| chr03  | 31838771  | C | A | 0.214 | 0.083 | 0.267 | 117248 | GALNTL2 | SPLICE_SITE_ACCEPTOR |
| chr03  | 31849753  | C | A | 0.19  | 0.083 | 0.233 | 117248 | GALNTL2 | SPLICE_SITE_ACCEPTOR |
| chr03  | 31857203  | C | A | 0.214 | 0.083 | 0.267 | 117248 | GALNTL2 | STOP_GAINED          |
| chr03  | 31862524  | C | T | 0.19  | 0.083 | 0.233 | 117248 | GALNTL2 | SPLICE_SITE_ACCEPTOR |
| chr03  | 31906873  | G | A | 0.19  | 0.083 | 0.233 | 117248 | GALNTL2 | STOP_GAINED          |
| chr03  | 49493774  | C | A | 0.048 | 0.167 | N/A   | 389158 | PLSCR5  | SPLICE_SITE_ACCEPTOR |
| chr03  | 61765662  | C | T | 0.024 | 0.083 | N/A   | 389161 | ANKUB1  | STOP_GAINED          |
| chr03  | 71756792  | T | G | 0.024 | 0.083 | N/A   | 151790 | WDR49   | SPLICE_SITE_ACCEPTOR |

|       |           |   |   |       |       |       |           |         |                      |
|-------|-----------|---|---|-------|-------|-------|-----------|---------|----------------------|
| chr03 | 77195091  | G | A | 0.048 | 0.167 | N/A   | 57552     | NCEH1   | STOP_GAINED          |
| chr03 | 84552406  | G | T | 0.025 | N/A   | 0.036 | 86        | ACTL6A  | SPLICE_SITE_DONOR    |
| chr03 | 88447148  | C | T | 0.143 | N/A   | 0.2   | 23101     | MCF2L2  | SPLICE_SITE_ACCEPTOR |
| chr03 | 89499798  | C | T | 0.381 | 0.417 | 0.367 | 1981      | EIF4G1  | STOP_GAINED          |
| chr03 | 91979027  | G | A | 0.024 | N/A   | 0.033 | 26998     | FETUB   | STOP_GAINED          |
| chr03 | 93577289  | G | T | 0.119 | N/A   | 0.167 | 9940      | DLEC1   | SPLICE_SITE_ACCEPTOR |
| chr03 | 93988930  | C | T | 0.024 | 0.083 | N/A   | 9941      | EXOG    | STOP_GAINED          |
| chr03 | 94016237  | A | G | 0.024 | N/A   | 0.033 | 9941      | EXOG    | SPLICE_SITE_ACCEPTOR |
| chr03 | 98527155  | C | T | 0.048 | N/A   | 0.067 | 100506243 | KRBOX1  | STOP_GAINED          |
| chr03 | 107966546 | C | A | 0.048 | 0.167 | N/A   | 95        | ACY1    | STOP_GAINED          |
| chr03 | 126200442 | C | T | 0.071 | 0.25  | N/A   | 51372     | TMA7    | START_LOST           |
| chr03 | 140495649 | C | T | 0.024 | 0.083 | N/A   | 5021      | OXTR    | STOP_GAINED          |
| chr03 | 144300189 | T | C | 0.405 | 0.5   | 0.367 | 5894      | RAF1    | STOP_LOST            |
| chr03 | 144306892 | C | T | 0.095 | 0.333 | N/A   | 5894      | RAF1    | STOP_GAINED          |
| chr03 | 153760789 | G | A | 0.024 | 0.083 | N/A   | 10954     | PDIA5   | STOP_GAINED          |
| chr03 | 155355017 | A | G | 0.19  | 0.25  | 0.167 | 503582    | ARGFX   | STOP_LOST            |
| chr03 | 155418613 | T | C | 0.024 | 0.083 | N/A   | 10721     | POLQ    | SPLICE_SITE_DONOR    |
| chr03 | 155433168 | C | T | 0.024 | 0.083 | N/A   | 10721     | POLQ    | STOP_GAINED          |
| chr03 | 157149638 | A | G | 0.071 | 0.083 | 0.067 | 8856      | NR1I2   | START_LOST           |
| chr03 | 163256134 | A | G | 0.048 | 0.083 | 0.033 | 523       | ATP6V1A | SPLICE_SITE_DONOR    |
| chr03 | 165390802 | C | T | 0.024 | 0.083 | N/A   | 10225     | CD96    | SPLICE_SITE_DONOR    |
| chr03 | 168248569 | T | C | 0.214 | N/A   | 0.3   | 84666     | RETNLB  | SPLICE_SITE_DONOR    |
| chr03 | 168248569 | T | * | 0.024 | N/A   | 0.033 | 84666     | RETNLB  | SPLICE_SITE_DONOR    |
| chr03 | 178520595 | C | A | 0.024 | 0.083 | N/A   | 10402     | ST3GAL6 | SPLICE_SITE_DONOR    |
| chr03 | 178951181 | A | G | 0.357 | 0.333 | 0.367 | 79310     | OR5H2   | START_LOST           |
| chr03 | 182910752 | T | A | 0.071 | 0.25  | N/A   | 63899     | NSUN3   | STOP_GAINED          |
| chr04 | 1752514   | T | C | 0.024 | 0.083 | N/A   | 152877    | FAM53A  | SPLICE_SITE_ACCEPTOR |
| chr04 | 5897465   | A | G | 0.024 | 0.083 | N/A   | 132884    | EVC2    | START_LOST           |
| chr04 | 24716429  | T | C | 0.095 | N/A   | 0.133 | 29063     | ZCCHC4  | STOP_LOST            |
| chr04 | 38389078  | C | T | 0.262 | 0.167 | 0.3   | 7096      | TLR1    | STOP_GAINED          |
| chr04 | 48106178  | C | T | 0.024 | N/A   | 0.033 | 7006      | TEC     | SPLICE_SITE_ACCEPTOR |
| chr04 | 58188236  | C | A | 0.048 | 0.167 | N/A   | 100129583 | FAM47E  | STOP_GAINED          |
| chr04 | 58514153  | C | T | 0.071 | N/A   | 0.1   | 27163     | NAAA    | STOP_GAINED          |
| chr04 | 58529083  | T | G | 0.024 | 0.083 | N/A   | 27163     | NAAA    | STOP_GAINED          |

|       |           |   |   |       |       |       |        |           |                      |
|-------|-----------|---|---|-------|-------|-------|--------|-----------|----------------------|
| chr04 | 60733650  | C | A | 0.024 | 0.083 | N/A   | 5197   | PF4V1     | STOP_GAINED          |
| chr04 | 80553653  | G | T | 0.024 | 0.083 | N/A   | 170825 | GSX2      | STOP_GAINED          |
| chr04 | 97548813  | C | T | 0.048 | 0.083 | 0.033 | 1977   | EIF4E     | START_LOST           |
| chr04 | 97928915  | A | G | 0.024 | N/A   | 0.033 | 440567 | UQCRHL    | START_LOST           |
| chr04 | 98290933  | G | T | 0.024 | 0.083 | N/A   | 4547   | MTTP      | SPLICE_SITE_DONOR    |
| chr04 | 107478179 | G | C | 0.095 | 0.167 | 0.067 | 6164   | RPL34     | SPLICE_SITE_DONOR    |
| chr04 | 118212241 | G | T | 0.024 | 0.083 | N/A   | 54532  | USP53     | STOP_GAINED          |
| chr04 | 153396560 | G | A | 0.071 | N/A   | 0.1   | 23240  | KIAA0922  | SPLICE_SITE_ACCEPTOR |
| chr04 | 153526389 | C | T | 0.024 | 0.083 | N/A   | 285533 | RNF175    | SPLICE_SITE_DONOR    |
| chr04 | 154296963 | T | C | 0.024 | 0.083 | N/A   | 54798  | DCHS2     | STOP_LOST            |
| chr04 | 154400171 | T | A | 0.024 | N/A   | 0.033 | 2243   | FGA       | STOP_GAINED          |
| chr05 | 189006    | A | T | 0.19  | N/A   | 0.267 | 133957 | CCDC127   | STOP_GAINED          |
| chr05 | 196787    | G | A | 0.357 | 0.417 | 0.333 | 6389   | SDHA      | STOP_GAINED          |
| chr05 | 4985013   | G | A | 0.048 | N/A   | 0.067 | 170690 | ADAMTS16  | STOP_GAINED          |
| chr05 | 7771466   | T | A | 0.048 | 0.083 | 0.033 | 4552   | MTRR      | START_LOST           |
| chr05 | 24071650  | C | T | 0.75  | N/A   | 0.75  | 56979  | PRDM9     | STOP_GAINED          |
| chr05 | 35363501  | G | T | 0.381 | 0.5   | 0.333 | 64902  | AGXT2     | STOP_GAINED          |
| chr05 | 41737652  | C | G | 0.024 | 0.083 | N/A   | 729    | C6        | SPLICE_SITE_DONOR    |
| chr05 | 43691109  | C | T | 0.048 | N/A   | 0.067 | 389289 | ANXA2R    | STOP_GAINED          |
| chr05 | 55917023  | G | A | 0.024 | 0.083 | N/A   | 166979 | CDC20B    | STOP_GAINED          |
| chr05 | 59470976  | C | A | 0.143 | N/A   | 0.2   | 285668 | C5orf64   | STOP_GAINED          |
| chr05 | 67674133  | A | G | 0.048 | 0.167 | N/A   | 4671   | NAIP      | SPLICE_SITE_ACCEPTOR |
| chr05 | 75619419  | C | T | 0.024 | N/A   | 0.033 | 23743  | BHMT2     | STOP_GAINED          |
| chr05 | 84951846  | G | A | 0.5   | 0.5   | 0.5   | 153396 | TMEM161B  | STOP_GAINED          |
| chr05 | 133440123 | C | A | 0.024 | 0.083 | N/A   | 26223  | FBXL21    | STOP_GAINED          |
| chr05 | 138754648 | C | T | 0.024 | 0.083 | N/A   | 56122  | PCDHB14   | STOP_GAINED          |
| chr05 | 155528501 | C | A | 0.048 | N/A   | 0.067 | 11063  | SOX30     | STOP_GAINED          |
| chr05 | 179582864 | T | A | 0.024 | 0.083 | N/A   | 285659 | OR2V2     | STOP_GAINED          |
| chr05 | 179583121 | C | T | 0.024 | 0.083 | N/A   | 285659 | OR2V2     | STOP_GAINED          |
| chr05 | 179583585 | G | C | 0.024 | 0.083 | N/A   | 285659 | OR2V2     | STOP_LOST            |
| chr06 | 26309245  | A | G | 0.048 | N/A   | 0.067 | 10050  | SLC17A4   | SPLICE_SITE_ACCEPTOR |
| chr06 | 26728417  | G | T | 0.048 | N/A   | 0.067 | 8343   | HIST1H2BF | START_LOST           |
| chr06 | 27036908  | A | T | 0.143 | 0.167 | 0.133 | 11120  | BTN2A1    | STOP_GAINED          |
| chr06 | 28689750  | G | A | 0.024 | N/A   | 0.033 | 64288  | ZSCAN31   | STOP_GAINED          |

|       |           |   |   |       |       |       |        |              |                      |
|-------|-----------|---|---|-------|-------|-------|--------|--------------|----------------------|
| chr06 | 29875280  | C | T | 0.024 | 0.083 | N/A   | 26531  | OR11A1       | START_LOST           |
| chr06 | 30116639  | G | T | 0.095 | N/A   | 0.133 | 3134   | MAMU-F       | STOP_GAINED          |
| chr06 | 31003006  | C | T | 0.071 | N/A   | 0.1   | 202658 | TRIM39-RPP21 | STOP_GAINED          |
| chr06 | 32270485  | C | T | 0.571 | 0.667 | 0.533 | 4277   | MICB         | STOP_GAINED          |
| chr06 | 32785380  | G | A | 0.19  | 0.167 | 0.2   | 1589   | CYP21A2      | STOP_GAINED          |
| chr06 | 32787939  | C | T | 0.024 | N/A   | 0.033 | 1589   | CYP21A2      | STOP_GAINED          |
| chr06 | 32789599  | C | G | 0.048 | N/A   | 0.067 | 7148   | TNXB         | SPLICE_SITE_DONOR    |
| chr06 | 32792225  | C | T | 0.048 | N/A   | 0.067 | 7148   | TNXB         | SPLICE_SITE_ACCEPTOR |
| chr06 | 33547051  | C | T | 0.048 | N/A   | 0.067 | 6891   | TAP2         | SPLICE_SITE_DONOR    |
| chr06 | 33571596  | G | C | 0.024 | 0.083 | N/A   | 6890   | TAP1         | STOP_GAINED          |
| chr06 | 33571624  | T | C | 0.024 | 0.083 | N/A   | 6890   | TAP1         | START_LOST           |
| chr06 | 33664118  | G | A | 0.095 | N/A   | 0.133 | 3109   | MAMU-DMB     | STOP_GAINED          |
| chr06 | 34212117  | T | C | 0.175 | 0.25  | 0.143 | 221504 | ZBTB9        | SPLICE_SITE_DONOR    |
| chr06 | 37153866  | G | C | 0.571 | 0.583 | 0.567 | 389384 | C6orf222     | SPLICE_SITE_ACCEPTOR |
| chr06 | 43819797  | C | T | 0.048 | 0.167 | N/A   | 171558 | PTCRA        | STOP_GAINED          |
| chr06 | 50911867  | T | C | 0.476 | 0.417 | 0.5   | 245927 | DEFB113      | START_LOST           |
| chr06 | 53720746  | C | T | 0.452 | 0.5   | 0.433 | 221357 | GSTA5        | SPLICE_SITE_ACCEPTOR |
| chr06 | 57962298  | C | T | 0.071 | N/A   | 0.1   | 57691  | KIAA1586     | STOP_GAINED          |
| chr06 | 73925049  | G | A | 0.024 | 0.083 | N/A   | 4646   | MYO6         | SPLICE_SITE_DONOR    |
| chr06 | 102918730 | C | A | 0.048 | N/A   | 0.067 | 57673  | BEND3        | SPLICE_SITE_ACCEPTOR |
| chr06 | 107080532 | T | C | 0.048 | N/A   | 0.067 | 94120  | SYTL3        | SPLICE_SITE_ACCEPTOR |
| chr06 | 122001861 | G | A | 0.024 | 0.083 | N/A   | 7402   | UTRN         | STOP_GAINED          |
| chr06 | 134452537 | C | G | 0.024 | 0.083 | N/A   | 116843 | SLC18B1      | STOP_GAINED          |
| chr06 | 134624136 | G | A | 0.024 | 0.083 | N/A   | 9287   | TAAR2        | STOP_GAINED          |
| chr06 | 137393385 | A | G | 0.167 | N/A   | 0.233 | 253582 | TMEM244      | START_LOST           |
| chr06 | 150812988 | G | A | 0.071 | 0.25  | N/A   | 221303 | FAM162B      | STOP_GAINED          |
| chr06 | 155636720 | T | C | 0.025 | N/A   | 0.036 | 8838   | WISP3        | SPLICE_SITE_ACCEPTOR |
| chr06 | 158652747 | T | C | 0.024 | 0.083 | N/A   | 27244  | SESN1        | SPLICE_SITE_DONOR    |
| chr06 | 161010861 | C | T | 0.071 | N/A   | 0.1   | 6580   | SLC22A1      | STOP_GAINED          |
| chr06 | 168598679 | T | C | 0.643 | 0.75  | 0.6   | 83887  | TLL2         | STOP_LOST            |
| chr06 | 171483955 | G | A | 0.024 | 0.083 | N/A   | 84498  | FAM120B      | STOP_GAINED          |
| chr07 | 4353095   | T | C | 0.048 | 0.167 | N/A   | 7033   | TFF3         | START_LOST           |
| chr07 | 7847520   | G | A | 0.024 | 0.083 | N/A   | 2114   | ETS2         | STOP_GAINED          |
| chr07 | 10501680  | A | G | 0.024 | 0.083 | N/A   | 9980   | DOPEY2       | SPLICE_SITE_DONOR    |

|       |           |   |   |       |       |       |        |         |                      |
|-------|-----------|---|---|-------|-------|-------|--------|---------|----------------------|
| chr07 | 13052407  | C | T | 0.5   | 0.5   | 0.5   | 29980  | DONSON  | STOP_GAINED          |
| chr07 | 40582609  | A | G | 0.024 | N/A   | 0.033 | 27102  | EIF2AK1 | SPLICE_SITE_ACCEPTOR |
| chr07 | 40643537  | C | T | 0.024 | 0.083 | N/A   | 5395   | PMS2    | STOP_GAINED          |
| chr07 | 40693818  | G | A | 0.143 | N/A   | 0.2   | 222967 | RSPH10B | SPLICE_SITE_ACCEPTOR |
| chr07 | 40842686  | G | A | 0.024 | 0.083 | N/A   | 7784   | ZP3     | STOP_GAINED          |
| chr07 | 41600110  | A | C | 0.048 | N/A   | 0.067 | 3092   | HIP1    | SPLICE_SITE_ACCEPTOR |
| chr07 | 41732862  | C | T | 0.024 | 0.083 | N/A   | 55695  | NSUN5   | SPLICE_SITE_DONOR    |
| chr07 | 60173571  | G | A | 0.19  | N/A   | 0.267 | 154664 | ABCA13  | STOP_GAINED          |
| chr07 | 64039919  | A | G | 0.071 | N/A   | 0.1   | 29881  | NPC1L1  | SPLICE_SITE_ACCEPTOR |
| chr07 | 68928617  | G | A | 0.048 | 0.083 | 0.033 | 57002  | YAE1D1  | STOP_GAINED          |
| chr07 | 100206286 | A | G | 0.167 | N/A   | 0.233 | 3382   | ICA1    | SPLICE_SITE_ACCEPTOR |
| chr07 | 116901700 | G | A | 0.024 | N/A   | 0.033 | 57639  | CCDC146 | STOP_GAINED          |
| chr07 | 118103364 | A | C | 0.048 | 0.167 | N/A   | 54809  | SAMD9   | STOP_GAINED          |
| chr07 | 122969450 | G | C | 0.475 | 0.5   | 0.467 | 440    | ASNS    | STOP_GAINED          |
| chr07 | 132633234 | G | A | 0.048 | N/A   | 0.067 | 10466  | COG5    | STOP_GAINED          |
| chr07 | 133138323 | C | G | 0.024 | 0.083 | N/A   | 22798  | LAMB4   | SPLICE_SITE_ACCEPTOR |
| chr07 | 133625083 | G | A | 0.048 | 0.083 | 0.033 | 168451 | THAP5   | STOP_GAINED          |
| chr07 | 141942769 | G | A | 0.333 | 0.167 | 0.4   | 4233   | MET     | STOP_GAINED          |
| chr07 | 141942772 | G | A | 0.024 | 0.083 | N/A   | 4233   | MET     | STOP_GAINED          |
| chr07 | 142074111 | G | T | 0.238 | 0.333 | 0.2   | 830    | CAPZA2  | STOP_GAINED          |
| chr07 | 147682387 | G | A | 0.095 | N/A   | 0.133 | 10157  | AASS    | SPLICE_SITE_DONOR    |
| chr07 | 160386626 | G | T | 0.048 | 0.167 | N/A   | 57016  | AKR1B10 | SPLICE_SITE_ACCEPTOR |
| chr07 | 160392900 | G | A | 0.262 | 0.417 | 0.2   | 57016  | AKR1B10 | SPLICE_SITE_ACCEPTOR |
| chr07 | 161047675 | A | G | 0.095 | N/A   | 0.133 | 55281  | TMEM140 | SPLICE_SITE_ACCEPTOR |
| chr07 | 164571189 | T | C | 0.143 | N/A   | 0.2   | 136306 | SVOPL   | SPLICE_SITE_ACCEPTOR |
| chr07 | 166629826 | C | T | 0.024 | 0.083 | N/A   | 90956  | ADCK2   | STOP_GAINED          |
| chr07 | 167727379 | T | G | 0.024 | N/A   | 0.033 | 54429  | TAS2R5  | STOP_GAINED          |
| chr07 | 167727584 | G | A | 0.024 | 0.083 | N/A   | 54429  | TAS2R5  | STOP_GAINED          |
| chr07 | 170020913 | C | T | 0.024 | 0.083 | N/A   | 202865 | C7orf33 | SPLICE_SITE_DONOR    |
| chr07 | 174394687 | C | A | 0.024 | 0.083 | N/A   | 7984   | ARHGEF5 | STOP_GAINED          |
| chr07 | 174572688 | G | A | 0.048 | 0.167 | N/A   | 442361 | OR2A2   | STOP_GAINED          |
| chr07 | 174898594 | C | T | 0.071 | N/A   | 0.1   | 285966 | FAM115C | STOP_GAINED          |
| chr07 | 176760788 | C | T | 0.024 | N/A   | 0.033 | 285973 | ATG9B   | SPLICE_SITE_DONOR    |
| chr07 | 176800324 | G | C | 0.024 | N/A   | 0.033 | 6522   | SLC4A2  | SPLICE_SITE_ACCEPTOR |

|       |           |   |   |       |       |       |        |          |                      |
|-------|-----------|---|---|-------|-------|-------|--------|----------|----------------------|
| chr07 | 182712308 | G | A | 0.024 | 0.083 | N/A   | 64327  | LMBR1    | SPLICE_SITE_DONOR    |
| chr08 | 7354134   | C | A | 0.048 | 0.167 | N/A   | 653423 | SPAG11A  | STOP_GAINED          |
| chr08 | 11968044  | T | C | 0.5   | 0.5   | 0.5   | 10395  | DLC1     | SPLICE_SITE_ACCEPTOR |
| chr08 | 11972676  | G | A | 0.5   | 0.5   | 0.5   | 10395  | DLC1     | STOP_GAINED          |
| chr08 | 11974854  | C | A | 0.5   | 0.5   | 0.5   | 10395  | DLC1     | SPLICE_SITE_DONOR    |
| chr08 | 11974991  | G | A | 0.5   | 0.5   | 0.5   | 10395  | DLC1     | STOP_GAINED          |
| chr08 | 11977065  | G | A | 0.5   | 0.5   | 0.5   | 10395  | DLC1     | STOP_GAINED          |
| chr08 | 28823618  | A | G | 0.167 | N/A   | 0.233 | 79618  | HMBX1    | SPLICE_SITE_ACCEPTOR |
| chr08 | 31137399  | C | T | 0.024 | 0.083 | N/A   | 7486   | WRN      | STOP_GAINED          |
| chr08 | 40463678  | C | T | 0.024 | 0.083 | N/A   | 169355 | IDO2     | STOP_GAINED          |
| chr08 | 41377120  | C | T | 0.19  | 0.167 | 0.2   | 138050 | HGSNAT   | STOP_GAINED          |
| chr08 | 41377178  | G | A | 0.25  | 0.333 | 0.214 | 138050 | HGSNAT   | STOP_GAINED          |
| chr08 | 50242018  | T | C | 0.262 | 0.333 | 0.233 | 137902 | PXDNL    | STOP_LOST            |
| chr08 | 56308306  | C | T | 0.024 | 0.083 | N/A   | 137886 | UBXN2B   | STOP_GAINED          |
| chr08 | 56457376  | G | T | 0.024 | N/A   | 0.033 | 8439   | NSMAF    | STOP_GAINED          |
| chr08 | 59483773  | C | A | 0.143 | N/A   | 0.2   | 444    | ASPH     | STOP_GAINED          |
| chr08 | 64421373  | C | G | 0.024 | 0.083 | N/A   | 137872 | ADHFE1   | STOP_GAINED          |
| chr08 | 72060947  | A | G | 0.2   | N/A   | 0.286 | 6921   | TCEB1    | SPLICE_SITE_DONOR    |
| chr08 | 78107804  | G | A | 0.024 | N/A   | 0.033 | 7163   | TPD52    | STOP_GAINED          |
| chr08 | 96495063  | T | A | 0.024 | 0.083 | N/A   | 203111 | C8orf47  | STOP_GAINED          |
| chr08 | 99127485  | T | C | 0.025 | 0.083 | N/A   | 169166 | SNX31    | START_LOST           |
| chr08 | 107975833 | T | A | 0.024 | N/A   | 0.033 | 93035  | PKHD1L1  | STOP_GAINED          |
| chr08 | 108018062 | G | A | 0.024 | 0.083 | N/A   | 93035  | PKHD1L1  | SPLICE_SITE_ACCEPTOR |
| chr08 | 108051741 | C | A | 0.071 | 0.083 | 0.067 | 93035  | PKHD1L1  | STOP_GAINED          |
| chr08 | 108051741 | C | T | 0.048 | 0     | 0.067 | 93035  | PKHD1L1  | STOP_GAINED          |
| chr08 | 108103459 | G | A | 0.095 | N/A   | 0.133 | 93035  | PKHD1L1  | STOP_GAINED          |
| chr08 | 131614241 | G | A | 0.071 | N/A   | 0.1   | 23639  | LRRC6    | STOP_GAINED          |
| chr08 | 140467832 | C | T | 0.024 | 0.083 | N/A   | 389690 | MROH5    | STOP_GAINED          |
| chr08 | 141760880 | G | A | 0.024 | N/A   | 0.033 | 137797 | LYPD2    | STOP_GAINED          |
| chr09 | 2953879   | T | C | 0.048 | 0.167 | N/A   | 8789   | FBP2     | STOP_LOST            |
| chr09 | 5630331   | A | G | 0.024 | N/A   | 0.033 | 10507  | SEMA4D   | SPLICE_SITE_ACCEPTOR |
| chr09 | 8818750   | T | G | 0.405 | 0.5   | 0.367 | 389766 | C9orf153 | SPLICE_SITE_DONOR    |
| chr09 | 17001983  | T | A | 0.024 | N/A   | 0.033 | 2776   | GNAQ     | SPLICE_SITE_DONOR    |
| chr09 | 48576036  | T | C | 0.048 | N/A   | 0.067 | 3448   | IFNA14   | START_LOST           |



|       |           |   |   |       |       |       |        |          |                      |
|-------|-----------|---|---|-------|-------|-------|--------|----------|----------------------|
| chr09 | 59742858  | C | A | 0.024 | 0.083 | N/A   | 23586  | DDX58    | STOP_GAINED          |
| chr09 | 61311683  | G | C | 0.024 | 0.083 | N/A   | 57462  | KIAA1161 | STOP_GAINED          |
| chr09 | 62680876  | C | A | 0.143 | 0.417 | 0.033 | 10488  | CREB3    | STOP_GAINED          |
| chr09 | 62692858  | A | C | 0.071 | 0.167 | 0.033 | 57704  | GBA2     | START_LOST           |
| chr09 | 66423597  | A | G | 0.119 | N/A   | 0.167 | 83744  | ZNF484   | SPLICE_SITE_ACCEPTOR |
| chr09 | 68489826  | T | C | 0.095 | 0.333 | N/A   | 54829  | ASPN     | STOP_LOST            |
| chr09 | 68582048  | G | T | 0.048 | N/A   | 0.067 | 4958   | OMD      | STOP_LOST            |
| chr09 | 70580271  | T | C | 0.024 | N/A   | 0.033 | 1306   | COL15A1  | SPLICE_SITE_DONOR    |
| chr09 | 76157460  | A | C | 0.333 | 0.333 | 0.333 | 138804 | OR13C4   | STOP_GAINED          |
| chr09 | 76204503  | G | T | 0.024 | 0.083 | N/A   | 138802 | OR13C8   | STOP_GAINED          |
| chr09 | 82632332  | A | G | 0.024 | N/A   | 0.033 | 1902   | LPAR1    | SPLICE_SITE_DONOR    |
| chr09 | 87199365  | T | C | 0.024 | N/A   | 0.033 | 50514  | DEC1     | SPLICE_SITE_DONOR    |
| chr09 | 93164492  | G | A | 0.024 | 0.083 | N/A   | 2934   | GSN      | SPLICE_SITE_DONOR    |
| chr09 | 94634779  | C | T | 0.024 | 0.083 | N/A   | 158131 | OR1Q1    | STOP_GAINED          |
| chr09 | 100976963 | A | G | 0.024 | 0.083 | N/A   | 29941  | PKN3     | SPLICE_SITE_ACCEPTOR |
| chr09 | 105891178 | G | C | 0.024 | 0.083 | N/A   | 28     | ABO      | STOP_GAINED          |
| chr10 | 12108340  | C | T | 0.024 | N/A   | 0.033 | 55526  | DHTKD1   | STOP_GAINED          |
| chr10 | 12224965  | A | T | 0.024 | N/A   | 0.033 | 8872   | CDC123   | SPLICE_SITE_ACCEPTOR |
| chr10 | 12224966  | G | T | 0.024 | N/A   | 0.033 | 8872   | CDC123   | SPLICE_SITE_ACCEPTOR |
| chr10 | 15073712  | T | C | 0.214 | N/A   | 0.3   | 414149 | ACBD7    | STOP_LOST            |
| chr10 | 16969042  | C | T | 0.5   | 0.5   | N/A   | 8029   | CUBN     | SPLICE_SITE_DONOR    |
| chr10 | 16976199  | G | A | 0.5   | 0.5   | 0.5   | 8029   | CUBN     | STOP_GAINED          |
| chr10 | 16979822  | G | A | 0.214 | N/A   | 0.3   | 8029   | CUBN     | STOP_GAINED          |
| chr10 | 21735638  | T | G | 0.024 | N/A   | 0.033 | 8028   | MLLT10   | STOP_GAINED          |
| chr10 | 21757949  | C | T | 0.024 | N/A   | 0.033 | 8028   | MLLT10   | STOP_GAINED          |
| chr10 | 25989213  | A | G | 0.667 | 0.583 | 0.708 | 53904  | MYO3A    | SPLICE_SITE_DONOR    |
| chr10 | 43062554  | G | T | 0.143 | N/A   | 0.2   | 57705  | WDFY4    | STOP_GAINED          |
| chr10 | 44409005  | T | C | 0.143 | 0.5   | N/A   | 83849  | SYT15    | SPLICE_SITE_DONOR    |
| chr10 | 53166469  | C | A | 0.048 | N/A   | 0.067 | 57178  | ZMIZ1    | SPLICE_SITE_DONOR    |
| chr10 | 61986507  | G | A | 0.025 | N/A   | 0.036 | 55222  | LRRC20   | SPLICE_SITE_DONOR    |
| chr10 | 62735559  | A | C | 0.024 | 0.083 | N/A   | 219738 | C10orf35 | SPLICE_SITE_DONOR    |
| chr10 | 63693573  | G | A | 0.405 | 0.417 | 0.4   | 55749  | CCAR1    | STOP_GAINED          |
| chr10 | 63695068  | C | T | 0.476 | 0.5   | 0.467 | 55749  | CCAR1    | SPLICE_SITE_DONOR    |
| chr10 | 63697521  | C | T | 0.476 | 0.5   | 0.467 | 55749  | CCAR1    | SPLICE_SITE_DONOR    |

|       |           |   |   |       |       |       |        |           |                      |
|-------|-----------|---|---|-------|-------|-------|--------|-----------|----------------------|
| chr10 | 63697606  | T | C | 0.357 | 0.167 | 0.433 | 55749  | CCAR1     | SPLICE_SITE_ACCEPTOR |
| chr10 | 64091506  | C | T | 0.048 | N/A   | 0.067 | 1763   | DNA2      | STOP_GAINED          |
| chr10 | 83862948  | T | C | 0.024 | 0.083 | N/A   | 340654 | LIPM      | START_LOST           |
| chr10 | 84433771  | C | A | 0.024 | 0.083 | N/A   | 439996 | IFIT1B    | STOP_GAINED          |
| chr10 | 88483299  | G | A | 0.024 | N/A   | 0.033 | 26509  | MYOF      | STOP_GAINED          |
| chr10 | 89777826  | C | T | 0.381 | 0.417 | 0.367 | 1562   | CYP2C18   | STOP_GAINED          |
| chr10 | 89777866  | T | C | 0.381 | 0.417 | 0.367 | 1562   | CYP2C18   | SPLICE_SITE_DONOR    |
| chr10 | 89786083  | C | T | 0.381 | 0.417 | 0.367 | 1562   | CYP2C18   | STOP_GAINED          |
| chr10 | 91488380  | C | A | 0.024 | 0.083 | N/A   | 9849   | ZNF518A   | STOP_GAINED          |
| chr10 | 97046465  | C | G | 0.024 | 0.083 | N/A   | 8945   | BTRC      | STOP_GAINED          |
| chr10 | 108029214 | T | C | 0.024 | N/A   | 0.033 | 6975   | TECTB     | STOP_LOST            |
| chr10 | 121610294 | G | A | 0.048 | 0.167 | N/A   | 7390   | UROS      | SPLICE_SITE_DONOR    |
| chr10 | 121837848 | A | C | 0.024 | 0.083 | N/A   | 8038   | ADAM12    | STOP_LOST            |
| chr10 | 129412692 | C | T | 0.024 | 0.083 | N/A   | 196743 | PAOX      | STOP_GAINED          |
| chr11 | 1697997   | C | T | 0.167 | 0.083 | 0.2   | 4046   | LSP1      | STOP_GAINED          |
| chr11 | 1725257   | T | C | 0.238 | 0.083 | 0.3   | 7140   | TNNT3     | SPLICE_SITE_DONOR    |
| chr11 | 1726971   | A | T | 0.1   | N/A   | 0.143 | 7140   | TNNT3     | SPLICE_SITE_ACCEPTOR |
| chr11 | 1729574   | G | A | 0.095 | 0.083 | 0.1   | 7140   | TNNT3     | SPLICE_SITE_DONOR    |
| chr11 | 3136425   | C | G | 0.024 | 0.083 | N/A   | 440051 | KRTAP5-11 | SPLICE_SITE_ACCEPTOR |
| chr11 | 6675552   | C | T | 0.214 | N/A   | 0.3   | 347853 | TBX10     | STOP_GAINED          |
| chr11 | 6856884   | C | T | 0.025 | 0.083 | N/A   | 390212 | GPR152    | STOP_GAINED          |
| chr11 | 8470639   | G | A | 0.025 | 0.083 | N/A   | 11007  | CCDC85B   | STOP_GAINED          |
| chr11 | 8479890   | T | C | 0.024 | 0.083 | N/A   | 1521   | CTSW      | SPLICE_SITE_ACCEPTOR |
| chr11 | 12140433  | T | C | 0.024 | 0.083 | N/A   | 7439   | BEST1     | SPLICE_SITE_ACCEPTOR |
| chr11 | 12322604  | C | T | 0.026 | 0.083 | N/A   | 3992   | FADS1     | STOP_GAINED          |
| chr11 | 13271784  | A | G | 0.048 | 0.167 | N/A   | 79080  | CCDC86    | STOP_LOST            |
| chr11 | 14430439  | C | T | 0.024 | N/A   | 0.033 | 219983 | OR4D6     | STOP_GAINED          |
| chr11 | 14444570  | G | A | 0.024 | N/A   | 0.033 | 219982 | OR5A1     | STOP_GAINED          |
| chr11 | 14735027  | C | T | 0.357 | 0.5   | 0.3   | 374393 | FAM111B   | STOP_GAINED          |
| chr11 | 15096751  | C | A | 0.048 | N/A   | 0.067 | 219968 | OR5B21    | STOP_GAINED          |
| chr11 | 15315193  | A | G | 0.071 | 0.083 | 0.067 | 219959 | OR1S1     | START_LOST           |
| chr11 | 15315936  | G | A | 0.024 | 0.083 | N/A   | 219959 | OR1S1     | STOP_GAINED          |
| chr11 | 15454897  | C | T | 0.024 | 0.083 | N/A   | 219952 | OR6Q1     | STOP_GAINED          |
| chr11 | 16619152  | C | T | 0.095 | 0.167 | 0.067 | 338675 | OR5AP2    | STOP_GAINED          |

|       |           |   |   |       |       |       |        |          |                      |
|-------|-----------|---|---|-------|-------|-------|--------|----------|----------------------|
| chr11 | 17061564  | C | G | 0.143 | 0.083 | 0.167 | 10798  | OR5I1    | STOP_GAINED          |
| chr11 | 17988195  | G | T | 0.05  | 0.167 | N/A   | 23279  | NUP160   | START_LOST           |
| chr11 | 32699815  | G | A | 0.095 | 0.333 | N/A   | 91614  | DEPDC7   | STOP_GAINED          |
| chr11 | 35504512  | C | T | 0.31  | 0.25  | 0.333 | 2488   | FSHB     | SPLICE_SITE_ACCEPTOR |
| chr11 | 55735384  | C | T | 0.024 | N/A   | 0.033 | 10894  | LYVE1    | STOP_GAINED          |
| chr11 | 58268722  | T | C | 0.143 | N/A   | 0.2   | 7275   | TUB      | START_LOST           |
| chr11 | 58513197  | C | T | 0.524 | 0.25  | 0.633 | 120065 | OR5P2    | STOP_GAINED          |
| chr11 | 60760876  | G | T | 0.048 | N/A   | 0.067 | 85363  | TRIM5    | SPLICE_SITE_ACCEPTOR |
| chr11 | 61275328  | C | A | 0.071 | 0.167 | 0.033 | 283111 | OR51V1   | STOP_GAINED          |
| chr11 | 61793376  | C | T | 0.024 | 0.083 | N/A   | 401666 | OR51A4   | STOP_GAINED          |
| chr11 | 66383886  | G | T | 0.524 | 0.667 | 0.467 | 10825  | NEU3     | START_LOST           |
| chr11 | 69584839  | C | T | 0.024 | 0.083 | N/A   | 79053  | ALG8     | SPLICE_SITE_DONOR    |
| chr11 | 81502835  | G | A | 0.024 | 0.083 | N/A   | 390231 | TRIM77   | SPLICE_SITE_DONOR    |
| chr11 | 84892033  | C | T | 0.024 | 0.083 | N/A   | 4544   | MTNR1B   | STOP_GAINED          |
| chr11 | 94060576  | G | A | 0.024 | 0.083 | N/A   | 253935 | ANGPTL5  | STOP_GAINED          |
| chr11 | 95296767  | C | T | 0.024 | N/A   | 0.033 | 79659  | DYNC2H1  | SPLICE_SITE_DONOR    |
| chr11 | 97216698  | A | C | 0.048 | 0.167 | N/A   | 440068 | CARD17   | SPLICE_SITE_DONOR    |
| chr11 | 97217967  | G | A | 0.095 | N/A   | 0.133 | 440068 | CARD17   | STOP_GAINED          |
| chr11 | 99497064  | G | A | 0.5   | 0.5   | 0.5   | 143884 | CWF19L2  | STOP_GAINED          |
| chr11 | 100622296 | C | A | 0.024 | 0.083 | N/A   | 143888 | KDEL2    | SPLICE_SITE_DONOR    |
| chr11 | 103661060 | C | T | 0.024 | 0.083 | N/A   | 143903 | LAYN     | STOP_GAINED          |
| chr11 | 109474026 | A | G | 0.405 | 0.917 | 0.2   | 22897  | CEP164   | SPLICE_SITE_DONOR    |
| chr11 | 120934553 | G | T | 0.071 | 0.083 | 0.067 | 63970  | TP53AIP1 | STOP_GAINED          |
| chr11 | 122862219 | G | A | 0.25  | 0.167 | 0.286 | 399979 | SNX19    | STOP_GAINED          |
| chr12 | 7494154   | C | T | 0.476 | 0.583 | 0.433 | 9746   | CLSTN3   | SPLICE_SITE_DONOR    |
| chr12 | 7734066   | G | A | 0.024 | 0.083 | N/A   | 283316 | CD163L1  | STOP_GAINED          |
| chr12 | 10242311  | C | A | 0.143 | N/A   | 0.2   | 387836 | CLEC2A   | STOP_GAINED          |
| chr12 | 11157377  | G | A | 0.024 | 0.083 | N/A   | 50837  | TAS2R7   | STOP_GAINED          |
| chr12 | 11868381  | A | G | 0.69  | 0.917 | 0.6   | 5542   | PRB1     | STOP_LOST            |
| chr12 | 13312918  | C | A | 0.143 | N/A   | 0.2   | 2842   | GPR19    | SPLICE_SITE_DONOR    |
| chr12 | 26415961  | G | A | 0.024 | N/A   | 0.033 | 160492 | IFLTD1   | STOP_GAINED          |
| chr12 | 41314069  | C | T | 0.119 | N/A   | 0.167 | 80070  | ADAMTS20 | SPLICE_SITE_DONOR    |
| chr12 | 42355896  | T | G | 0.167 | N/A   | 0.233 | 84216  | TMEM117  | STOP_LOST            |
| chr12 | 45295813  | C | T | 0.143 | N/A   | 0.2   | 91523  | PCED1B   | STOP_GAINED          |

|       |           |   |   |       |       |       |        |           |                      |
|-------|-----------|---|---|-------|-------|-------|--------|-----------|----------------------|
| chr12 | 46704663  | G | A | 0.214 | 0.167 | 0.233 | 341568 | OR8S1     | SPLICE_SITE_ACCEPTOR |
| chr12 | 51352811  | G | A | 0.238 | 0.083 | 0.3   | 5916   | RARG      | STOP_GAINED          |
| chr12 | 54628870  | T | A | 0.024 | 0.083 | N/A   | 319    | APOF      | STOP_GAINED          |
| chr12 | 54749725  | A | C | 0.024 | 0.083 | N/A   | 27165  | GLS2      | STOP_GAINED          |
| chr12 | 55026183  | G | C | 0.143 | 0.083 | 0.167 | 8630   | HSD17B6   | SPLICE_SITE_DONOR    |
| chr12 | 56034610  | G | A | 0.214 | N/A   | 0.3   | 1019   | CDK4      | STOP_GAINED          |
| chr12 | 62007152  | G | A | 0.048 | 0.167 | N/A   | 10329  | TMEM5     | STOP_GAINED          |
| chr12 | 80759668  | G | A | 0.286 | 0.417 | 0.233 | 29080  | CCDC59    | STOP_GAINED          |
| chr12 | 89992747  | A | T | 0.071 | N/A   | 0.1   | 196477 | CCER1     | STOP_GAINED          |
| chr12 | 99421222  | A | G | 0.119 | N/A   | 0.167 | 23074  | UHRF1BP1L | SPLICE_SITE_DONOR    |
| chr12 | 100830824 | G | A | 0.024 | 0.083 | N/A   | 121599 | SPIC      | SPLICE_SITE_DONOR    |
| chr12 | 100837594 | G | A | 0.405 | 0.5   | 0.367 | 121599 | SPIC      | STOP_GAINED          |
| chr12 | 101542950 | A | T | 0.024 | 0.083 | N/A   | 55010  | PARPBP    | STOP_GAINED          |
| chr12 | 106281595 | C | A | 0.048 | N/A   | 0.067 | 80298  | MTERFD3   | STOP_GAINED          |
| chr12 | 109889898 | T | A | 0.024 | N/A   | 0.033 | 144715 | RAD9B     | START_LOST           |
| chr12 | 110110700 | G | A | 0.238 | 0.083 | 0.3   | 5501   | PPP1CC    | STOP_GAINED          |
| chr12 | 110118434 | G | T | 0.238 | 0.083 | 0.3   | 5501   | PPP1CC    | STOP_GAINED          |
| chr12 | 110759892 | T | C | 0.025 | 0.083 | N/A   | 144717 | FAM109A   | SPLICE_SITE_ACCEPTOR |
| chr12 | 112299196 | C | T | 0.262 | 0.167 | 0.3   | 22895  | RPH3A     | SPLICE_SITE_DONOR    |
| chr12 | 112344727 | G | A | 0.095 | 0.333 | N/A   | 4938   | OAS1      | STOP_GAINED          |
| chr12 | 112344751 | G | A | 0.095 | 0.333 | N/A   | 4938   | OAS1      | STOP_GAINED          |
| chr12 | 119741797 | A | G | 0.024 | 0.083 | N/A   | 10985  | GCN1L1    | SPLICE_SITE_DONOR    |
| chr12 | 120641487 | A | G | 0.048 | N/A   | 0.067 | 8638   | OASL      | SPLICE_SITE_DONOR    |
| chr12 | 120823088 | G | A | 0.024 | 0.083 | N/A   | 5027   | P2RX7     | SPLICE_SITE_DONOR    |
| chr12 | 124117709 | T | C | 0.024 | 0.083 | N/A   | 144347 | FAM101A   | SPLICE_SITE_DONOR    |
| chr12 | 125170772 | C | A | 0.024 | 0.083 | N/A   | 114795 | TMEM132B  | STOP_GAINED          |
| chr12 | 125170784 | T | C | 0.024 | 0.083 | N/A   | 114795 | TMEM132B  | SPLICE_SITE_DONOR    |
| chr12 | 132259608 | A | * | 0.75  | 0.5   | 0.818 | 57634  | EP400     | SPLICE_SITE_DONOR    |
| chr12 | 132259608 | A | G | 0.071 | 0.333 | 0     | 57634  | EP400     | SPLICE_SITE_DONOR    |
| chr13 | 55521     | C | A | 0.375 | 0.3   | 0.409 | 7278   | TUBA3C    | STOP_GAINED          |
| chr13 | 351063    | G | A | 0.5   | 0.5   | 0.5   | 55269  | PSPC1     | STOP_GAINED          |
| chr13 | 362489    | T | A | 0.5   | 0.5   | 0.5   | 55269  | PSPC1     | STOP_GAINED          |
| chr13 | 10504773  | G | T | 0.024 | 0.083 | N/A   | 122046 | TEX26     | SPLICE_SITE_DONOR    |
| chr13 | 16430870  | C | T | 0.024 | 0.083 | N/A   | 11340  | EXOSC8    | SPLICE_SITE_DONOR    |

|       |           |   |   |       |       |       |        |           |                      |
|-------|-----------|---|---|-------|-------|-------|--------|-----------|----------------------|
| chr13 | 31393313  | A | T | 0.071 | 0.25  | N/A   | 341676 | NEK5      | SPLICE_SITE_DONOR    |
| chr14 | 5310217   | G | A | 0.238 | 0.333 | 0.2   | 8924   | HERC2     | STOP_GAINED          |
| chr14 | 11020943  | C | G | 0.048 | N/A   | 0.067 | 54989  | ZNF770    | START_LOST           |
| chr14 | 17081192  | T | C | 0.45  | 0.167 | 0.571 | 55177  | RMDN3     | SPLICE_SITE_ACCEPTOR |
| chr14 | 17200744  | T | A | 0.5   | 0.5   | 0.5   | 6692   | SPINT1    | SPLICE_SITE_DONOR    |
| chr14 | 17877408  | C | T | 0.024 | 0.083 | N/A   | 26015  | RPAP1     | SPLICE_SITE_ACCEPTOR |
| chr14 | 18068084  | A | C | 0.024 | 0.083 | N/A   | 23269  | MGA       | SPLICE_SITE_ACCEPTOR |
| chr14 | 18356703  | G | A | 0.024 | 0.083 | N/A   | 123745 | PLA2G4E   | SPLICE_SITE_DONOR    |
| chr14 | 19960485  | G | A | 0.024 | 0.083 | N/A   | 9677   | PPIP5K1   | STOP_GAINED          |
| chr14 | 19961401  | G | A | 0.19  | 0.333 | 0.133 | 9677   | PPIP5K1   | STOP_GAINED          |
| chr14 | 19961620  | G | A | 0.024 | 0.083 | N/A   | 9677   | PPIP5K1   | STOP_GAINED          |
| chr14 | 21533089  | G | T | 0.333 | 0.167 | 0.4   | 9153   | SLC28A2   | SPLICE_SITE_ACCEPTOR |
| chr14 | 21536722  | C | T | 0.024 | 0.083 | N/A   | 9153   | SLC28A2   | STOP_GAINED          |
| chr14 | 21537499  | A | G | 0.024 | 0.083 | N/A   | 9153   | SLC28A2   | SPLICE_SITE_DONOR    |
| chr14 | 21539494  | G | A | 0.31  | 0.167 | 0.367 | 9153   | SLC28A2   | SPLICE_SITE_ACCEPTOR |
| chr14 | 28724841  | G | A | 0.238 | 0.417 | 0.167 | 4644   | MYO5A     | SPLICE_SITE_DONOR    |
| chr14 | 38606189  | G | C | 0.024 | 0.083 | N/A   | 145741 | C2CD4A    | SPLICE_SITE_ACCEPTOR |
| chr14 | 40158373  | G | A | 0.214 | N/A   | 0.3   | 8925   | HERC1     | SPLICE_SITE_DONOR    |
| chr14 | 59955654  | C | A | 0.5   | 0.5   | 0.5   | 79631  | EFTUD1    | SPLICE_SITE_DONOR    |
| chr14 | 59955777  | G | A | 0.5   | 0.5   | 0.5   | 79631  | EFTUD1    | STOP_GAINED          |
| chr14 | 66980202  | C | T | 0.31  | 0.417 | 0.267 | 11057  | ABHD2     | SPLICE_SITE_DONOR    |
| chr14 | 80742383  | G | A | 0.024 | 0.083 | N/A   | 390437 | OR4N5     | STOP_GAINED          |
| chr14 | 80913202  | A | T | 0.048 | N/A   | 0.067 | 81127  | OR4K15    | STOP_GAINED          |
| chr14 | 80945575  | T | G | 0.024 | 0.083 | N/A   | 79544  | OR4K1     | STOP_LOST            |
| chr14 | 81042946  | A | C | 0.024 | 0.083 | N/A   | 390429 | OR4N2     | STOP_GAINED          |
| chr14 | 81043311  | G | A | 0.119 | 0.417 | N/A   | 390429 | OR4N2     | STOP_GAINED          |
| chr14 | 81069204  | G | A | 0.071 | 0.25  | N/A   | 283694 | OR4N4     | STOP_GAINED          |
| chr14 | 81088559  | G | A | 0.071 | N/A   | 0.1   | 390538 | OR4M2     | STOP_GAINED          |
| chr14 | 81361896  | C | A | 0.024 | 0.083 | N/A   | 57820  | CCNB1IP1  | SPLICE_SITE_DONOR    |
| chr14 | 84815770  | C | T | 0.19  | 0.25  | 0.167 | 10202  | DHRS2     | STOP_GAINED          |
| chr14 | 107015310 | C | A | 0.024 | 0.083 | N/A   | 55320  | MIS18BP1  | SPLICE_SITE_ACCEPTOR |
| chr14 | 112746037 | G | A | 0.024 | 0.083 | N/A   | 5836   | PYGL      | SPLICE_SITE_DONOR    |
| chr14 | 116929106 | G | A | 0.143 | 0.5   | N/A   | 3958   | LGALS3    | SPLICE_SITE_ACCEPTOR |
| chr14 | 119238401 | A | G | 0.119 | 0.417 | N/A   | 55195  | C14orf105 | STOP_LOST            |

|       |           |   |   |       |       |       |        |          |                      |
|-------|-----------|---|---|-------|-------|-------|--------|----------|----------------------|
| chr14 | 125334050 | A | T | 0.5   | 0.5   | 0.5   | 112840 | WDR89    | STOP_GAINED          |
| chr14 | 125334499 | G | A | 0.5   | 0.5   | 0.5   | 112840 | WDR89    | STOP_GAINED          |
| chr14 | 132784131 | C | A | 0.024 | 0.083 | N/A   | 4293   | MAP3K9   | STOP_GAINED          |
| chr14 | 135385353 | C | G | 0.025 | N/A   | 0.036 | 89932  | PAPLN    | STOP_GAINED          |
| chr14 | 135711217 | C | T | 0.143 | N/A   | 0.2   | 122970 | ACOT4    | STOP_GAINED          |
| chr14 | 137116017 | G | A | 0.048 | 0.167 | N/A   | 27030  | MLH3     | STOP_GAINED          |
| chr14 | 137149230 | T | C | 0.024 | N/A   | 0.033 | 27030  | MLH3     | START_LOST           |
| chr14 | 154396250 | C | T | 0.024 | 0.083 | N/A   | 9321   | TRIP11   | SPLICE_SITE_ACCEPTOR |
| chr14 | 156913933 | A | C | 0.381 | 0.5   | 0.333 | 327657 | SERPINA9 | STOP_GAINED          |
| chr14 | 164720532 | A | G | 0.095 | N/A   | 0.133 | 55778  | ZNF839   | START_LOST           |
| chr15 | 6895378   | C | T | 0.235 | 0.417 | 0.136 | 140690 | CTCF     | SPLICE_SITE_DONOR    |
| chr15 | 18754912  | A | T | 0.024 | 0.083 | N/A   | 391253 | SPINT4   | STOP_LOST            |
| chr15 | 25677420  | G | C | 0.143 | 0.167 | 0.133 | 3929   | LBP      | STOP_GAINED          |
| chr15 | 26978591  | G | A | 0.024 | 0.083 | N/A   | 5933   | RBL1     | SPLICE_SITE_ACCEPTOR |
| chr15 | 27406104  | C | T | 0.024 | 0.083 | N/A   | 84174  | SLA2     | SPLICE_SITE_DONOR    |
| chr15 | 30465218  | C | T | 0.024 | 0.083 | N/A   | 170487 | ACTL10   | STOP_GAINED          |
| chr15 | 31007262  | T | C | 0.571 | 0.833 | 0.467 | 359710 | BPIFB3   | SPLICE_SITE_DONOR    |
| chr15 | 31023012  | T | C | 0.786 | 0.833 | 0.767 | 359710 | BPIFB3   | START_LOST           |
| chr15 | 34012380  | G | T | 0.071 | N/A   | 0.1   | 642636 | RAD21L1  | SPLICE_SITE_ACCEPTOR |
| chr15 | 34389698  | C | T | 0.024 | 0.083 | N/A   | 10326  | SIRPB1   | SPLICE_SITE_ACCEPTOR |
| chr15 | 35789783  | T | G | 0.024 | 0.083 | N/A   | 5786   | PTPRA    | STOP_GAINED          |
| chr15 | 37649263  | A | G | 0.881 | 0.917 | 0.867 | 9770   | RASSF2   | SPLICE_SITE_DONOR    |
| chr15 | 56710557  | C | T | 0.5   | 0.5   | 0.5   | 128822 | CST9     | STOP_GAINED          |
| chr15 | 56828212  | G | A | 0.071 | N/A   | 0.1   | 1473   | CST5     | STOP_GAINED          |
| chr15 | 58093290  | G | A | 0.024 | 0.083 | N/A   | 30813  | VSX1     | STOP_GAINED          |
| chr15 | 58225497  | T | A | 0.119 | 0.333 | 0.033 | 955    | ENTPD6   | STOP_GAINED          |
| chr15 | 58335505  | G | A | 0.024 | 0.083 | N/A   | 26090  | ABHD12   | SPLICE_SITE_DONOR    |
| chr15 | 61095013  | C | T | 0.048 | 0.167 | N/A   | 128977 | C22orf39 | START_LOST           |
| chr15 | 61510621  | C | A | 0.048 | 0.083 | 0.033 | 54584  | GNB1L    | SPLICE_SITE_DONOR    |
| chr15 | 61819466  | C | G | 0.471 | 0.5   | 0.467 | 29801  | ZDHHC8   | STOP_GAINED          |
| chr15 | 66668341  | C | T | 0.5   | 0.5   | 0.5   | 2678   | GGT1     | STOP_GAINED          |
| chr15 | 66673963  | C | T | 0.476 | 0.417 | 0.5   | 2678   | GGT1     | STOP_GAINED          |
| chr15 | 66762820  | A | C | 0.595 | 0.417 | 0.667 | 440822 | PIWIL3   | SPLICE_SITE_ACCEPTOR |
| chr15 | 74207461  | C | T | 0.048 | 0.167 | N/A   | 254240 | BPIFC    | STOP_GAINED          |

|       |          |   |   |       |       |       |        |           |                      |
|-------|----------|---|---|-------|-------|-------|--------|-----------|----------------------|
| chr15 | 77158869 | A | G | 0.048 | N/A   | 0.067 | 10043  | TOM1      | START_LOST           |
| chr15 | 82795937 | C | A | 0.024 | 0.083 | N/A   | 150353 | DNAJB7    | STOP_GAINED          |
| chr15 | 85931042 | G | A | 0.025 | 0.083 | N/A   | 150379 | PNPLA5    | STOP_GAINED          |
| chr15 | 86868074 | C | T | 0.024 | 0.083 | N/A   | 23779  | ARHGAP8   | STOP_GAINED          |
| chr16 | 668181   | C | G | 0.025 | 0.083 | N/A   | 339123 | JMJD8     | START_LOST           |
| chr16 | 1946621  | G | A | 0.048 | N/A   | 0.067 | 10607  | TBL3      | STOP_GAINED          |
| chr16 | 12706019 | G | A | 0.024 | 0.083 | N/A   | 55313  | CPPED1    | STOP_GAINED          |
| chr16 | 19784209 | C | T | 0.024 | N/A   | 0.033 | 6296   | ACSM3     | STOP_GAINED          |
| chr16 | 25764853 | C | T | 0.095 | N/A   | 0.133 | 162083 | C16orf82  | STOP_GAINED          |
| chr16 | 26186354 | T | C | 0.071 | N/A   | 0.1   | 50615  | IL21R     | STOP_LOST            |
| chr16 | 27578956 | C | T | 0.024 | 0.083 | N/A   | 26471  | NUPR1     | STOP_GAINED          |
| chr16 | 27659709 | T | C | 0.024 | N/A   | 0.033 | 728689 | EIF3CL    | SPLICE_SITE_DONOR    |
| chr16 | 27886013 | G | A | 0.048 | N/A   | 0.067 | 1731   | SEPT1     | STOP_GAINED          |
| chr16 | 27886172 | C | T | 0.048 | N/A   | 0.067 | 1731   | SEPT1     | SPLICE_SITE_DONOR    |
| chr16 | 28914280 | G | A | 0.024 | 0.083 | N/A   | 146547 | PRSS36    | SPLICE_SITE_DONOR    |
| chr16 | 30288337 | A | C | 0.5   | 0.5   | 0.5   | 79801  | SHCBP1    | STOP_GAINED          |
| chr16 | 30288342 | C | A | 0.5   | 0.5   | 0.5   | 79801  | SHCBP1    | SPLICE_SITE_ACCEPTOR |
| chr16 | 30304022 | G | A | 0.024 | 0.083 | N/A   | 79801  | SHCBP1    | STOP_GAINED          |
| chr16 | 30305628 | C | T | 0.071 | 0.167 | 0.033 | 79801  | SHCBP1    | STOP_GAINED          |
| chr16 | 30359305 | T | C | 0.5   | 0.5   | 0.5   | 55737  | VPS35     | SPLICE_SITE_ACCEPTOR |
| chr16 | 30361791 | A | T | 0.5   | 0.5   | 0.5   | 55737  | VPS35     | STOP_GAINED          |
| chr16 | 30362517 | C | A | 0.5   | 0.5   | 0.5   | 55737  | VPS35     | SPLICE_SITE_ACCEPTOR |
| chr16 | 30364204 | C | T | 0.143 | N/A   | 0.2   | 55737  | VPS35     | STOP_GAINED          |
| chr16 | 30365783 | C | T | 0.5   | 0.5   | 0.5   | 55737  | VPS35     | SPLICE_SITE_DONOR    |
| chr16 | 30368907 | T | A | 0.5   | 0.5   | 0.5   | 55737  | VPS35     | STOP_GAINED          |
| chr16 | 50993194 | G | A | 0.119 | 0.083 | 0.133 | 8883   | NAE1      | STOP_GAINED          |
| chr16 | 51352346 | G | A | 0.375 | 0.333 | 0.393 | 653319 | KIAA0895L | STOP_GAINED          |
| chr16 | 51352661 | C | A | 0.024 | 0.083 | N/A   | 653319 | KIAA0895L | STOP_GAINED          |
| chr16 | 51918942 | T | C | 0.024 | 0.083 | N/A   | 81577  | GFOD2     | START_LOST           |
| chr16 | 52139717 | A | C | 0.024 | 0.083 | N/A   | 123904 | NRN1L     | STOP_LOST            |
| chr16 | 59708717 | G | T | 0.05  | 0.167 | N/A   | 79583  | TMEM231   | STOP_GAINED          |
| chr16 | 70259337 | A | T | 0.048 | N/A   | 0.067 | 23199  | GSE1      | STOP_GAINED          |
| chr17 | 4901030  | C | G | 0.024 | N/A   | 0.033 | 10749  | KIF1C     | STOP_GAINED          |
| chr17 | 6545128  | C | T | 0.048 | 0.167 | N/A   | 388327 | C17orf100 | STOP_GAINED          |

|       |          |   |   |       |       |       |           |          |                      |
|-------|----------|---|---|-------|-------|-------|-----------|----------|----------------------|
| chr17 | 8079645  | A | G | 0.095 | N/A   | 0.133 | 5187      | PER1     | SPLICE_SITE_DONOR    |
| chr17 | 8288147  | T | C | 0.333 | 0.5   | 0.267 | 124751    | KRBA2    | START_LOST           |
| chr17 | 8288147  | T | A | 0.024 | 0.083 | 0     | 124751    | KRBA2    | START_LOST           |
| chr17 | 10623226 | G | A | 0.214 | 0.083 | 0.267 | 6341      | SCO1     | STOP_GAINED          |
| chr17 | 12950811 | T | A | 0.024 | N/A   | 0.033 | 9912      | ARHGAP44 | SPLICE_SITE_DONOR    |
| chr17 | 22219900 | G | T | 0.024 | N/A   | 0.033 | 645832    | SEBOX    | STOP_GAINED          |
| chr17 | 22628543 | G | A | 0.19  | 0.25  | 0.167 | 284086    | NEK8     | SPLICE_SITE_ACCEPTOR |
| chr17 | 25137137 | C | T | 0.024 | N/A   | 0.033 | 4763      | NF1      | STOP_GAINED          |
| chr17 | 25162878 | A | T | 0.024 | N/A   | 0.033 | 4763      | NF1      | STOP_GAINED          |
| chr17 | 25163250 | G | C | 0.024 | N/A   | 0.033 | 4763      | NF1      | SPLICE_SITE_DONOR    |
| chr17 | 29235341 | C | A | 0.095 | 0.25  | 0.033 | 146857    | SLFN13   | STOP_GAINED          |
| chr17 | 29238703 | C | G | 0.024 | N/A   | 0.033 | 146857    | SLFN13   | SPLICE_SITE_DONOR    |
| chr17 | 34015648 | G | A | 0.024 | N/A   | 0.033 | 55771     | PRR11    | STOP_GAINED          |
| chr17 | 36282355 | G | A | 0.048 | 0.083 | 0.033 | 8161      | COIL     | STOP_GAINED          |
| chr17 | 36282504 | C | T | 0.048 | 0.083 | 0.033 | 8161      | COIL     | STOP_GAINED          |
| chr17 | 36282510 | C | T | 0.048 | 0.083 | 0.033 | 8161      | COIL     | STOP_GAINED          |
| chr17 | 42432643 | A | G | 0.048 | 0.167 | N/A   | 8714      | ABCC3    | SPLICE_SITE_DONOR    |
| chr17 | 44151473 | T | C | 0.048 | 0.167 | N/A   | 2695      | GIP      | STOP_LOST            |
| chr17 | 44349988 | G | C | 0.19  | 0.417 | 0.1   | 124989    | EFCAB13  | STOP_GAINED          |
| chr17 | 48498329 | A | G | 0.024 | 0.083 | N/A   | 125113    | KRT222   | SPLICE_SITE_DONOR    |
| chr17 | 48632540 | G | T | 0.024 | 0.083 | N/A   | 162605    | KRT28    | STOP_GAINED          |
| chr17 | 50866291 | T | A | 0.132 | 0.625 | N/A   | 146923    | RUNDC1   | SPLICE_SITE_DONOR    |
| chr17 | 55580568 | C | T | 0.333 | 0.083 | 0.433 | 63897     | HEATR6   | STOP_GAINED          |
| chr17 | 55582592 | A | T | 0.405 | 0.167 | 0.5   | 63897     | HEATR6   | SPLICE_SITE_ACCEPTOR |
| chr17 | 56871723 | G | A | 0.19  | N/A   | 0.267 | 81033     | KCNH6    | STOP_GAINED          |
| chr17 | 59307282 | T | C | 0.024 | 0.083 | N/A   | 201134    | CEP112   | SPLICE_SITE_ACCEPTOR |
| chr17 | 62156840 | C | T | 0.095 | N/A   | 0.133 | 10350     | ABCA9    | STOP_GAINED          |
| chr17 | 67943939 | C | T | 0.071 | N/A   | 0.1   | 100131439 | CD300LD  | STOP_GAINED          |
| chr17 | 69557934 | G | A | 0.024 | 0.083 | N/A   | 23265     | EXOC7    | STOP_GAINED          |
| chr18 | 6040273  | C | T | 0.024 | 0.083 | N/A   | 7050      | TGIF1    | SPLICE_SITE_DONOR    |
| chr18 | 12532276 | G | A | 0.024 | N/A   | 0.033 | 125488    | TTC39C   | SPLICE_SITE_DONOR    |
| chr18 | 12940791 | C | A | 0.024 | N/A   | 0.033 | 59340     | HRH4     | STOP_GAINED          |
| chr18 | 35910524 | C | T | 0.024 | N/A   | 0.033 | 51224     | TCEB3B   | STOP_GAINED          |
| chr18 | 58759817 | T | C | 0.048 | 0.083 | 0.033 | 79839     | CCDC102B | SPLICE_SITE_DONOR    |



|       |          |   |   |       |       |       |        |         |                      |
|-------|----------|---|---|-------|-------|-------|--------|---------|----------------------|
| chr19 | 128724   | G | A | 0.024 | 0.083 | N/A   | 51298  | THEG    | STOP_GAINED          |
| chr19 | 1259004  | G | A | 0.325 | 0.583 | 0.214 | 54760  | PCSK4   | STOP_GAINED          |
| chr19 | 3059593  | C | A | 0.024 | 0.083 | N/A   | 8698   | S1PR4   | STOP_GAINED          |
| chr19 | 6745161  | G | A | 0.119 | 0.333 | 0.033 | 718    | C3      | SPLICE_SITE_DONOR    |
| chr19 | 9037114  | G | C | 0.048 | 0.083 | 0.033 | 162998 | OR7D2   | STOP_LOST            |
| chr19 | 9305075  | G | A | 0.024 | N/A   | 0.033 | 147741 | ZNF560  | STOP_GAINED          |
| chr19 | 9833179  | T | C | 0.333 | N/A   | 0.467 | 50700  | RDH8    | START_LOST           |
| chr19 | 10164601 | C | A | 0.048 | 0.167 | N/A   | 3385   | ICAM3   | STOP_GAINED          |
| chr19 | 11243422 | C | A | 0.024 | 0.083 | N/A   | 115948 | CCDC151 | STOP_GAINED          |
| chr19 | 11316414 | G | A | 0.024 | N/A   | 0.033 | 51295  | ECSIT   | STOP_GAINED          |
| chr19 | 11534783 | G | A | 0.024 | N/A   | 0.033 | 55552  | ZNF823  | STOP_GAINED          |
| chr19 | 11664421 | C | A | 0.048 | 0.083 | 0.033 | 7620   | ZNF69   | STOP_GAINED          |
| chr19 | 11813146 | G | A | 0.024 | 0.083 | N/A   | 729747 | ZNF878  | STOP_GAINED          |
| chr19 | 12161244 | G | A | 0.024 | 0.083 | N/A   | 79973  | ZNF442  | STOP_GAINED          |
| chr19 | 14512550 | C | A | 0.024 | 0.083 | N/A   | 84449  | ZNF333  | STOP_GAINED          |
| chr19 | 16100208 | C | G | 0.45  | 0.417 | 0.464 | 58513  | EPS15L1 | SPLICE_SITE_ACCEPTOR |
| chr19 | 17055934 | T | C | 0.071 | 0.167 | 0.033 | 684    | BST2    | SPLICE_SITE_ACCEPTOR |
| chr19 | 18976408 | A | C | 0.214 | N/A   | 0.3   | 8625   | RFXANK  | SPLICE_SITE_ACCEPTOR |
| chr19 | 25426284 | C | T | 0.167 | 0.333 | 0.083 | 8725   | URI1    | STOP_GAINED          |
| chr19 | 30652565 | C | T | 0.048 | 0.167 | N/A   | 5349   | FXYD3   | STOP_GAINED          |
| chr19 | 30654659 | G | A | 0.048 | N/A   | 0.067 | 5349   | FXYD3   | STOP_GAINED          |
| chr19 | 31293736 | G | A | 0.071 | 0.25  | N/A   | 55851  | PSENE1  | SPLICE_SITE_DONOR    |
| chr19 | 32134517 | G | C | 0.225 | N/A   | 0.321 | 84911  | ZNF382  | SPLICE_SITE_DONOR    |
| chr19 | 33135517 | C | T | 0.048 | 0.083 | 0.033 | 84775  | ZNF607  | SPLICE_SITE_ACCEPTOR |
| chr19 | 35798813 | G | A | 0.024 | 0.083 | N/A   | 645    | BLVRB   | STOP_GAINED          |
| chr19 | 36270325 | G | C | 0.024 | 0.083 | N/A   | 1548   | CYP2A6  | STOP_GAINED          |
| chr19 | 36993359 | A | G | 0.119 | N/A   | 0.167 | 1089   | CEACAM4 | SPLICE_SITE_DONOR    |
| chr19 | 36994826 | C | G | 0.024 | 0.083 | N/A   | 1089   | CEACAM4 | SPLICE_SITE_DONOR    |
| chr19 | 36998898 | G | A | 0.476 | 0.083 | 0.633 | 1089   | CEACAM4 | STOP_GAINED          |
| chr19 | 38786447 | G | A | 0.143 | 0.333 | 0.067 | 7638   | ZNF221  | STOP_GAINED          |
| chr19 | 40460423 | T | G | 0.024 | 0.083 | N/A   | 80207  | OPA3    | STOP_LOST            |
| chr19 | 43121184 | C | T | 0.024 | 0.083 | N/A   | 22900  | CARD8   | STOP_GAINED          |
| chr19 | 44823094 | C | T | 0.119 | 0.333 | 0.033 | 259307 | IL4I1   | STOP_GAINED          |
| chr19 | 45724302 | A | T | 0.024 | 0.083 | N/A   | 3817   | KLK2    | SPLICE_SITE_ACCEPTOR |

|       |           |   |   |       |       |       |        |         |                      |
|-------|-----------|---|---|-------|-------|-------|--------|---------|----------------------|
| chr19 | 45724422  | C | T | 0.119 | N/A   | 0.167 | 3817   | KLK2    | STOP_GAINED          |
| chr19 | 45724591  | G | A | 0.024 | 0.083 | N/A   | 3817   | KLK2    | SPLICE_SITE_DONOR    |
| chr19 | 45827914  | G | A | 0.167 | 0.083 | 0.2   | 5650   | KLK7    | SPLICE_SITE_DONOR    |
| chr19 | 45840966  | G | A | 0.024 | 0.083 | N/A   | 11202  | KLK8    | STOP_GAINED          |
| chr19 | 46484442  | T | C | 0.024 | 0.083 | N/A   | 2358   | FPR2    | START_LOST           |
| chr19 | 47389999  | A | T | 0.024 | 0.083 | N/A   | 81856  | ZNF611  | START_LOST           |
| chr19 | 48373171  | G | A | 0.024 | 0.083 | N/A   | 55422  | ZNF331  | SPLICE_SITE_ACCEPTOR |
| chr19 | 48964413  | G | C | 0.048 | 0.083 | 0.033 | 79165  | LENG1   | STOP_GAINED          |
| chr19 | 48964550  | G | A | 0.048 | 0.083 | 0.033 | 79165  | LENG1   | STOP_GAINED          |
| chr19 | 51307630  | G | A | 0.048 | N/A   | 0.067 | 400720 | ZNF772  | STOP_GAINED          |
| chr19 | 52582793  | C | T | 0.024 | 0.083 | N/A   | 126206 | NLRP5   | SPLICE_SITE_DONOR    |
| chr19 | 52809490  | G | A | 0.048 | N/A   | 0.067 | 204801 | NLRP11  | SPLICE_SITE_ACCEPTOR |
| chrX  | 7536966   | C | T | 0.238 | 0.083 | 0.3   | 3730   | KAL1    | STOP_GAINED          |
| chrX  | 7552185   | G | A | 0.238 | 0.083 | 0.3   | 3730   | KAL1    | STOP_GAINED          |
| chrX  | 7552215   | G | A | 0.238 | 0.083 | 0.3   | 3730   | KAL1    | STOP_GAINED          |
| chrX  | 7552230   | G | A | 0.238 | 0.083 | 0.3   | 3730   | KAL1    | STOP_GAINED          |
| chrX  | 7554835   | G | A | 0.214 | 0.083 | 0.267 | 3730   | KAL1    | STOP_GAINED          |
| chrX  | 7563295   | A | G | 0.238 | 0.083 | 0.3   | 3730   | KAL1    | SPLICE_SITE_DONOR    |
| chrX  | 7708716   | G | A | 0.211 | 0.083 | 0.269 | 3730   | KAL1    | STOP_GAINED          |
| chrX  | 12153303  | C | T | 0.048 | 0.167 | N/A   | 171484 | FAM9C   | START_LOST           |
| chrX  | 12874814  | T | A | 0.024 | N/A   | 0.033 | 8481   | OFD1    | SPLICE_SITE_DONOR    |
| chrX  | 14505564  | G | A | 0.024 | 0.083 | N/A   | 140456 | ASB11   | STOP_GAINED          |
| chrX  | 38005722  | G | A | 0.024 | 0.083 | N/A   | 6103   | RPGR    | STOP_GAINED          |
| chrX  | 38028256  | C | A | 0.143 | 0.25  | 0.1   | 6103   | RPGR    | SPLICE_SITE_DONOR    |
| chrX  | 49235463  | C | A | 0.071 | 0.25  | N/A   | 27238  | GPKOW   | STOP_GAINED          |
| chrX  | 51841809  | G | T | 0.024 | 0.083 | N/A   | 9500   | MAGED1  | SPLICE_SITE_ACCEPTOR |
| chrX  | 54608399  | T | A | 0.024 | 0.083 | N/A   | 90737  | PAGE5   | SPLICE_SITE_DONOR    |
| chrX  | 95175602  | A | G | 0.5   | 0.5   | 0.5   | 2491   | CENPI   | SPLICE_SITE_ACCEPTOR |
| chrX  | 97844927  | C | T | 0.238 | 0.083 | 0.3   | 139231 | FAM199X | STOP_GAINED          |
| chrX  | 105147896 | C | A | 0.19  | 0.083 | 0.233 | 827    | CAPN6   | STOP_GAINED          |
| chrX  | 135472241 | C | T | 0.476 | 0.5   | 0.467 | 51438  | MAGEC2  | STOP_GAINED          |
| chrX  | 135473018 | G | T | 0.5   | 0.5   | 0.5   | 51438  | MAGEC2  | STOP_GAINED          |
| chrX  | 143133666 | G | T | 0.143 | 0.167 | 0.133 | 4107   | MAGEA8  | STOP_GAINED          |
| chrX  | 143344446 | G | A | 0.024 | 0.083 | N/A   | 4110   | MAGEA11 | STOP_GAINED          |

|      |           |   |   |     |     |     |     |        |             |
|------|-----------|---|---|-----|-----|-----|-----|--------|-------------|
| chrX | 146804588 | C | T | 0.5 | 0.5 | 0.5 | 492 | ATP2B3 | STOP_GAINED |
|------|-----------|---|---|-----|-----|-----|-----|--------|-------------|
