# Supplementary material
Source: PubMed Central journal article supplement (PMC5513488)
Supplement: NIHMS873546-supplement-5.pdf [file NIHMS873546-supplement-5.pdf]

| Chromosome | Position  | Accession       | Disorder                                                                               |
|------------|-----------|-----------------|----------------------------------------------------------------------------------------|
| 1          | 17028628  | RCV000013628.25 | Paragangliomas                                                                         |
| 1          | 17033078  | RCV000013616.18 | Paragangliomas                                                                         |
| 1          | 155239934 | RCV000004565.4  | Gaucher's disease, type 1                                                              |
| 1          | 247424041 | RCV000004619.3  | Familial cold urticaria                                                                |
| 2          | 166272731 | RCV000006728.2  | Paroxysmal extreme pain disorder                                                       |
| 2          | 232540072 | RCV000020009.28 | Multiple pterygium syndrome Escobar type                                               |
| 3          | 184354643 | RCV000201810.1  | Leukoencephalopathy with ataxia                                                        |
| 4          | 1001475   | RCV000178733.1  | Hurler syndrome                                                                        |
| 4          | 6301914   | RCV000023510.4  | Diabetes mellitus AND insipidus with optic atrophy AND deafness                        |
| 4          | 83267737  | RCV000195593.1  | not provided                                                                           |
| 5          | 1253798   | RCV000032395.1  | Idiopathic fibrosing alveolitis, chronic form                                          |
| 6          | 32038514  | RCV000012938.3  | 21-hydroxylase deficiency                                                              |
| 6          | 32042353  | RCV000133609.3  | Ehlers-Danlos-like syndrome due to tenascin-X deficiency                               |
| 6          | 43519412  | RCV000186584.2  | Leukodystrophy, hypomyelinating, 11                                                    |
| 7          | 65967863  | RCV000000948.4  | Mucopolysaccharidosis type VII                                                         |
| 7          | 66086763  | RCV000194332.1  | Argininosuccinate lyase deficiency                                                     |
| 8          | 47931496  | RCV000142391.4  | Immunodeficiency 26 with or without neurologic abnormalities                           |
| 8          | 116847588 | RCV000198309.1  | Cornelia de Lange syndrome 4                                                           |
| 9          | 105617967 | RCV000003371.3  | Congenital muscular dystrophy-dystroglycanopathy with brain and eye anomalies, type A4 |
| 9          | 135775346 | RCV000032796.2  | Early infantile epileptic encephalopathy 14                                            |
| 10         | 47322871  | RCV000074345.2  | Telangiectasia, hereditary hemorrhagic, type 5                                         |
| 10         | 124401788 | RCV000049547.1  | Ornithine aminotransferase deficiency                                                  |
| 11         | 2445479   | RCV000057665.2  | Congenital long QT syndrome                                                            |
| 11         | 47332111  | RCV000158263.1  | Cardiomyopathy                                                                         |
| 11         | 47332133  | RCV000154451.1  | Familial hypertrophic cardiomyopathy 4                                                 |
| 11         | 47332154  | RCV000158255.1  | Cardiomyopathy                                                                         |
| 11         | 47332173  | RCV000158461.1  | Cardiomyopathy                                                                         |
| 11         | 47332580  | RCV000151066.1  | Primary familial hypertrophic cardiomyopathy                                           |
| 11         | 47333658  | RCV000158214.1  | Cardiomyopathy                                                                         |
| 11         | 47335942  | RCV000158181.1  | Cardiomyopathy                                                                         |
| 13         | 32340392  | RCV000131111.2  | Hereditary cancer-predisposing syndrome                                                |
| 13         | 32379872  | RCV000131038.2  | Hereditary cancer-predisposing syndrome                                                |

|    |          |                 |                                                                                 |
|----|----------|-----------------|---------------------------------------------------------------------------------|
| 15 | 43604408 | RCV000151950.1  | Deafness, autosomal recessive 16                                                |
| 15 | 68211853 | RCV000023573.4  | Adult neuronal ceroid lipofuscinosis                                            |
| 16 | 88430169 | RCV000114795.1  | Keratoconus 1                                                                   |
| 19 | 11123264 | RCV000172965.1  | Familial hypercholesterolemia                                                   |
| 19 | 11448917 | RCV000014147.25 | Congenital cystic disease of liver                                              |
| 19 | 12896644 | RCV000207433.1  | Glutaric aciduria, type 1                                                       |
| 19 | 17816945 | RCV000015957.25 | Cryptorchidism, unilateral or bilateral                                         |
| 19 | 34394044 | RCV000014610.26 | Hemolytic anemia, nonspherocytic, due to glucose phosphate isomerase deficiency |
| 19 | 35842480 | RCV000049885.1  | Finnish congenital nephrotic syndrome                                           |
| 19 | 35848334 | RCV000049845.1  | Finnish congenital nephrotic syndrome                                           |
| 20 | 44623042 | RCV000002044.2  | Partial adenosine deaminase deficiency                                          |
| 20 | 63439610 | RCV000187884.1  | not provided                                                                    |
| 22 | 18918451 | RCV000004224.5  | Proline dehydrogenase deficiency                                                |
